# Supplementary material for: Factors Related to Serum Lipids Using Multilevel Quantile Mixed Model: Analysis of Nationwide STEPs Survey 2016
Source: Research Square preprint supplement (doi:10.21203/rs.3.rs-910063/v1), 2021-09-21
Supplement: Supplementary file 1 [file f2cec191f35640277603aa6c.docx]

Supplementary:

Body Mass Index, waist circumference, diabetes mellitus and hypertension in both genders were significantly correlated with all levels of TG in all quantiles with an increasing trend. High physical activity significantly decreased the high levels of TG. In other words, the higher the TG, the more effective was intensive physical activity. Having higher education level showed a positive relationship with TG in many quantiles. Daily smoking significantly affects the level of TG in most percentiles. Married men had a higher level of TG in many quantiles, compared to singles. In females, the effect of age on TG was positive so that higher levels of TG were elevated as people getting older (Table S1 and S2).

Age and BMI in both genders were positively correlated with all levels of LDL-C at all studied centiles and diabetes in low quantiles had negative association with LDL-C levels. Married individuals had higher LDL-C levels than single individuals. In men, waist circumference at quantiles of P25- P90 and hypertension at the high quantile had positive association with LDL-C levels. LDL-C of men with high level of physical activity, was reduced. High blood pressure was negatively correlated in the low quantile of LDL-C and positively related at upper quantiles, in females. Daily smoking increased females’ LDL-C levels in percentiles 10 and 25. Similar results can be seen in higher educated women (Table S3 and S4).

In male and female participants, age had a positive and significant relationship with all quantiles of HDL-C levels and showed an increasing trend. On the other hand, body mass index and waist circumference showed significant negative relation with HDL-C levels in all quantiles. Diabetes had a negative association with HDL-C levels. In individuals with high level of physical activity, HDL-C has increased compared to those with less physical activity. In men, daily smoking were significantly and negatively correlated with HDL-C levels in all quantiles. Females with high level of education had higher HDL-C than illiterates but the level of HDL-C was reduced in married women (Table S5 and S6).

According to Table S7 and S8, BMI, waist circumference in both genders were significantly correlated with LDL-C/HDL-C ratio in all quantiles. In addition, daily smoking was positively correlated with men’s TC/HDL-C ratio at all quantiles. Diabetes is meaningful in first quantile (P10) and last quantile (P90); first it had a negative correlation with TC/HDL-C ratio but in last quintile it showed a positive correlation and increased TC/HDL-C ratio. High physical activity in men decreased TC/HDL-C ratio in all quantiles compared to low physical activity levels. TC/HDL-C ratio was increased in married men and those with higher education. However, in females, a positive association was observed for age at all quantiles and diabetes and hypertension in upper quantiles.

BMI, waist circumference in both genders were significantly correlated with LDL-C/HDL-C ratio in all quantiles. But diabetes was negatively correlated in lower quantiles and positively at upper ones. Smoking in men had a positive correlation with LDL-C/HDL-C ratio so that regression coefficients tend to increase at high quantiles. High physical activity decreased LDL-C/HDL-C ratio at all quantiles. This ratio was increased in married and also university educated men (Table S9 and S10).

**Table S1** Three-level Quantile regression coefficients for male participants’ TG in 2016 National STEPs study.

| Linear Regression | P90 | P75 | P50 | P25 | P10 | Factors |
| --- | --- | --- | --- | --- | --- | --- |
| -0.33 ± 0.11  (0.003) | -0.53 ± 0.28  (0.07) | -0.41 ± 0.13  **(0.003)** | 0.05 ± 0.09  (0.57) | 0.04 ± 0.07  (0.56) | 0.08 ± 0.06  (0.17) | Age (year) |
| 4.37 ± 0.37  (<0.001) | 8.15 ± 0.90  **(<0.001)** | 6.46 ± 0.52  **(<0.001)** | 3.96 ± 0.50  **(<0.001)** | 2.49 ± 0.39  **(<0.001)** | 1.47 ± 0.23  **(<0.001)** | BMI(kg/m2) |
| 0.63 ± 0.12  (<0.001) | 0.86 ± 0.27  **(0.002)** | 0.56 ± 0.16  **(0.001)** | 0.46 ± 0.13  **(<0.001)** | 0.42 ± 0.11  **(<0.001)** | 0.34 ± 0.07  **(<0.001)** | WC (cm) |
| 23.68 ± 3.47  (<0.001) | 35.14 ± 12.55  **(0.006)** | 27.29 ± 4.83  **(<0.001)** | 19.42 ± 3.96  **(<0.001)** | 9.40 ± 2.21  **(<0.001)** | 5.40 ± 3.40  (0.11) | Diabetes |
| 9.22 ± 2.47  (<0.001) | 18.24 ± 6.90  **(0.009)** | 11.57 ± 3.95  **(0.004)** | 7.46 ± 2.55  **(0.004)** | 3.53 ± 1.30  **(0.008)** | 2.54 ± 1.09  **(0.02)** | Hypertension |
| 9.17 ± 2.54  (<0.001) | 9.23 ± 6.46  (0.15) | 12.53 ± 2.92  **(<0.001)** | 6.87 ± 1.74  **(<0.001)** | 6.29 ± 1.22  **(<0.001)** | 5.18 ± 1.40  **(<0.001)** | Smoking |
|  |  |  |  |  |  | Physical Activity |
| -9.14 ± 2.74  (0.17) | -12.79 ± 6.73  (0.06) | -8.06 ± 4.69  (0.08) | -4.31 ± 3.13  (0.17) | -2.53 ± 1.65  (0.12) | -1.43 ± 1.65  (0.38) | Moderate |
| -10.57 ± 2.27  (<0.001) | -12.23 ± 6.40  **(0.05)** | -11.32 ± 3.22  **(<0.001)** | -6.70 ± 1.60  **(<0.001)** | -6.11 ± 1.44  **(<0.001)** | -2.00 ± 1.14  (0.08) | High |
|  |  |  |  |  |  | Education Level |
| 8.53 ± 4.69  (0.06) | 12.15 ± 8.31  (0.14) | 8.62 ± 4.01  **(0.03)** | 7.38 ± 2.72  **(0.007)** | 5.18 ± 2.74  (0.06) | 4.93 ± 2.21  **(0.02)** | 1-6 |
| 18.62 ± 4.62  (<0.001) | 27.76 ± 9.79  **(0.005)** | 15.63 ± 4.23  **(<0.001)** | 14.11 ± 2.72  **(<0.001)** | 8.70 ± 2.55  **(<0.001)** | 8.26 ± 2.30  **(<0.001)** | 7-12 |
| 22.01 ± 4.95  (<0.001) | 25.54 ± 9.51  **(0.008)** | 19.89 ± 5.70  **(<0.001)** | 16.62 ± 3.36  **(<0.001)** | 12.72 ± 2.79  **(<0.001)** | 11.06 ± 2.45  **(<0.001)** | >12 |
|  |  |  |  |  |  | Marital Status |
| 12.21 ± 3.43  (<0.001) | 18.64 ± 8.94  **(0.03)** | 9.84 ± 4.67  **(0.03)** | 8.94 ± 2.77  **(0.001)** | 3.26 ± 2.25  (0.15) | 0.89 ± 1.68  (0.59) | Married |
| 8.35 ± 10.30  (0.41) | 22.29 ± 22.55  (0.32) | 16.88 ± 16.91  (0.32) | 0.14 ± 11.73  (0.99) | 3.97 ± 5.58  (0.47) | 3.60 ± 7.04  (0.61) | Divorced/ Widowed |
|  |  |  |  |  |  | Residence |
|  | - | 272.20 | 100.82 | 15.18 | 4.59 |  |
|  | - | 0.02 | 0.01 | - | - | ICC |
|  |  |  |  |  |  | Province |
|  | 2469.09 | 159.6 | 21.65 | - | 3.92 |  |
|  | 0.06 | 0.01 | - | - | - | ICC |
|  | 33819.21 | 12588.84 | 5959.84 | 5803.39 | 7334.20 |  |
| 89759.5 | 95925.8 | 90448.6 | 86445.5 | 84523.4 | 84235.9 | AIC |

Entries show β ± SE (p - value) for 10th, 25th, 50th, 75th and 90th percentiles of TG. Significant coefficients are shown in Bold. AIC: Akaike Information Criterion, ICC: Intraclass Correlation Coefficient, : Random effect variance, **:** Error variance.

**Table S2** Three-level Quantile regression coefficients for female participants’ TG in 2016 National STEPs study.

| Linear Regression | P90 | P75 | P50 | P25 | P10 | Factors |
| --- | --- | --- | --- | --- | --- | --- |
| 0.65 ± 0.08  (<0.001) | 1.00 ± 0.24  **(<0.001)** | 0.79 ± 0.11  **(<0.001)** | 0.66 ± 0.06  **(<0.001)** | 0.55 ± 0.04  **(<0.001)** | 0.41 ± 0.04  **(<0.001)** | Age (year) |
| 1.37 ± 022  (<0.001) | 2.82 ± 0.71  **(<0.001)** | 2.27 ± 0.45  **(<0.001)** | 1.48 ± 0.20  **(<0.001)** | 0.93 ± 0.12  **(<0.001)** | 0.71 ± 0.12  **(<0.001)** | BMI(kg/m2) |
| 0.76 ± 0.08  (<0.001) | 1.06 ± 0.26  **(<0.001)** | 0.82 ± 0.20  **(<0.001)** | 0.55 ± 0.10  **(<0.001)** | 0.42 ± 0.06  **(<0.001)** | 0.30 ± 0.06  **(<0.001)** | WC (cm) |
| 27.97 ± 2.31  (<0.001) | 57.41 ± 7.79  **(<0.001)** | 35.21 ± 4.59  **(<0.001)** | 20.43 ± 3.10  **(<0.001)** | 10.11 ± 1.90  **(<0.001)** | 6.53 ± 1.82  **(<0.001)** | Diabetes |
| 7.48 ± 1.80  (<0.001) | 10.70 ± 3.43  **(0.002)** | 9.45 ± 2.50  **(<0.001)** | 6.39 ± 1.30  **(<0.001)** | 4.15 ± 1.42  **(0.004)** | 3.15 ± 1.21  **(0.01)** | Hypertension |
|  |  |  |  |  |  | Physical Activity |
| -1.25 ± 1.89  (0.50) | -3.69 ± 4.29  (0.39) | -1.39 ± 2.73  (0.60) | 1.70 ± 1.68  (0.31) | 2.10 ± 1.04  (0.10) | 2.20 ± 0.99  (0.08) | Moderate |
| -4.55 ± 2.06  (0.02) | -6.07 ± 5.67  (0.28) | -7.08 ± 2.30  **(0.002)** | -4.90 ± 1.68  **(0.004)** | -2.10 ± 1.25  (0.09) | -0.35 ± 1.04  (0.73) | High |
|  |  |  |  |  |  | Education Level |
| 2.26 ± 2.52  (0.36) | 8.37 ± 4.76  (0.08) | 6.00 ± 3.42  (0.08) | 2.26 ± 1.54  (0.14) | 2.23 ± 1.64  (0.17) | 2.08 ± 1.31  (0.11) | 1-6 |
| 8.03 ± 2.59  (0.001) | 12.09 ± 6.93  (0.08) | 9.32 ± 3.58  **(0.01)** | 5.99 ± 2.00  **(0.003)** | 4.28 ± 1.93  **(0.02)** | 2.47 ± 1.54  (0.11) | 7-12 |
| 5.64 ± 2.90  (0.05) | 9.48 ± 6.17  (0.12) | 6.69 ± 3.76  **(0.05)** | 2.36 ± 1.58  (0.13) | 2.68 ± 2.20  (0.22) | 2.84 ± 1.58  (0.07) | >12 |
|  |  |  |  |  |  | Residence |
|  | 765.9 | 133.29 | 39.61 | 25.98 | 13.59 |  |
|  | 0.03 | 0.01 | - | - | - | ICC |
|  |  |  |  |  |  | Province |
|  | 289.8 | 38.67 | 10.81 | 13.25 | 4.32 |  |
|  | 0.01 | - | - | - | - | ICC |
|  | 23073.61 | 8712.35 | 4039.87 | 3875.06 | 4893.00 |  |
| 104733.5 | 112469 | 105984.7 | 100960.8 | 98540.9 | 98180.7 | AIC |

Entries show β ± SE (p - value) for 10th, 25th, 50th, 75th and 90th percentiles of TG. Significant coefficients are shown in Bold. AIC: Akaike Information Criterion, ICC: Intraclass Correlation Coefficient, : Random effect variance, **:** Error variance.

**Table S3** Three-level Quantile regression coefficients for male participants’ LDL-C in 2016 National STEPs study.

| Linear Regression | P90 | P75 | P50 | P25 | P10 | Factors |
| --- | --- | --- | --- | --- | --- | --- |
| 0.24 ± 0.03  (<0.001) | 0.39 ± 0.07  **(<0.001)** | 0.39 ± 0.03  **(<0.001)** | 0.30 ± 0.03  **(<0.001)** | 0.20 ± 0.03  **(<0.001)** | 0.12 ± 0.04  **(0.01)** | Age (year) |
| 0.78 ± 0.11  (<0.001) | 1.34 ± 0.27  **(<0.001)** | 0.87 ± 0.21  **(<0.001)** | 0.84 ± 0.17  **(<0.001)** | 0.60 ± 0.13  **(<0.001)** | 0.82 ± 0.17  **(<0.001)** | BMI(kg/m2) |
| 0.19 ± 0.04  (<0.001) | 0.09 ± 0.11  (0.41) | 0.24 ± 0.08  **(0.005)** | 0.20 ± 0.06  **(0.002)** | 0.24 ± 0.04  **(<0.001)** | 0.11 ± 0.07  (0.15) | WC (cm) |
| -4.83 ± 1.09  (<0.001) | 2.67 ± 2.52  (0.27) | -1.76 ± 1.73  (0.31) | -4.01 ± 1.72  **(0.02)** | -9.80 ± 1.74  **(<0.001)** | -12.15 ± 1.99  **(<0.001)** | Diabetes |
| 0.90 ± 0.77  (0.24) | 2.30 ± 1.19  **(0.05)** | 1.19 ± 0.89  (0.18) | 0.46 ± 0.99  (0.64) | -0.97 ± 0.91  (0.29) | -2.02 ± 1.31  (0.12) | Hypertension |
|  |  |  |  |  |  | Physical Activity |
| -2.36 ± 0.85  (0.005) | -1.58 ± 2.23  (0.47) | -3.35 ± 1.23  **(0.009)** | -3.32 ± 1.15  **(0.004)** | -1.98 ± 1.07  (0.06) | -1.50 ± 1.22  (0.22) | Moderate |
| -1.91 ± 0.70  (0.006) | -3.68 ± 1.01  **(<0.001)** | -2.41 ± 0.77  **(0.002)** | -1.77 ± 1.58  **(0.002)** | -1.56 ± 0.76  **(0.04)** | -1.30 ± 0.81  (0.11) | High |
|  |  |  |  |  |  | Marital Status |
| 0.50 ± 1.06  (0.63) | -2.13 ± 2.48  (0.39) | 0.75 ± 1.36  (0.68) | 1.33 ± 0.81  (0.10) | 2.28 ± 0.90  **(0.01)** | 2.43 ± 1.11  **(0.03)** | Married |
| 0.25 ± 3.22  (0.93) | -1.68 ± 8.29  (0.83) | 0.88 ± 5.38  (0.87) | 0.84 ± 5.16  (0.87) | -1.88 ± 3.73  (0.61) | 2.50 ± 2.95  (0.39) | Divorced/ Widowed |
|  |  |  |  |  |  | Residence |
|  | 107.29 | 40.49 | 11.49 | 11.69 | 12.90 |  |
|  | 0.03 | 0.02 | 0.01 | - | - | ICC |
|  |  |  |  |  |  | Province |
|  | 31.98 | 30.57 | 10.67 | 5.38 | 8.30 |  |
|  | 0.01 | 0.02 | 0.01 | - | - | ICC |
|  | 2658.43 | 1392.78 | 894.01 | 1157.36 | 1867.10 |  |
| 72191 | 76636.8 | 73765.7 | 72061.1 | 72321.1 | 73899.6 | AIC |

Entries show β ± SE (p - value) for 10th, 25th, 50th, 75th and 90th percentiles of LDL-cholesterol. Significant coefficients are shown in Bold. AIC: Akaike Information Criterion, ICC: Intraclass Correlation Coefficient, : Random effect variance, **:** Error variance.

**Table S4** Three-level Quantile regression coefficients for female participants’ LDL-C in 2016 National STEPs study.

| Linear Regression | P90 | P75 | P50 | P25 | P10 | Factors |
| --- | --- | --- | --- | --- | --- | --- |
| 0.56 ± 0.03  (<0.001) | 0.86 ± 0.07  **(<0.001)** | 0.79 ± 0.04  **(0.01)** | 0.61 ± 0.03  **(<0.001)** | 0.51 ± 0.04  **(<0.001)** | 0.43 ± 0.04  **(<0.001)** | Age (year) |
| 0.71 ± 0.09  (<0.001) | 0.78 ± 0.18  **(<0.001)** | 0.74 ± 0.16  **(<0.001)** | 0.79 ± 0.11  **(<0.001)** | 0.93 ± 0.09  **(<0.001)** | 1.06 ± 0.16  **(<0.001)** | BMI(kg/m2) |
| 0.09 ± 0.05  (0.008) | 0.13 ± 0.07  (0.10) | 0.08 ± 0.06  (0.14) | 0.04 ± 0.03  **(0.05)** | -0.009 ± 0.04  (0.84) | -0.10 ± 0.05  (0.10) | WC (cm) |
| -2.19 ± 0.92  (0.01) | -0.42 ± 2.65  (0.87) | -0.19 ± 1.26  (0.78) | -2.23 ± 0.96  **(0.02)** | -3.60 ± 1.29  **(0.006)** | -6.73 ± 1.54  **(<0.001)** | Diabetes |
| 1.07 ± 0.72  (0.13) | 1.71 ± 1.03  (0.10) | 2.45 ± 1.05  **(0.02)** | 1.22 ± 0.59  **(0.04)** | -0.59 ± 1.03  (0.57) | -1.77 ± 0.84  **(0.03)** | Hypertension |
| 3.96 ± 3.88  (0.30) | -4.89 ± 5.81  (0.40) | 5.23 ± 4.52  (0.24) | 4.15 ± 2.71  (0.12) | 7.72 ± 3.94  **(0.05)** | 9.76 ± 3.88  **(0.01)** | Smoking |
|  |  |  |  |  |  | Education Level |
| 0.56 ± 1.00  (0.57) | 1.50 ± 2.10  (0.47) | 1.25 ± 1.35  (0.35) | 1.31 ± 1.18  (0.26) | 1.57 ± 1.42  (0.27) | 0.45 ± 1.45  (0.75) | 1-6 |
| 2.02 ± 1.03  (0.05) | 3.47 ± 2.35  (0.14) | 2.35 ± 1.52  (0.12) | 2.11 ± 1.39  (0.13) | 2.97 ± 1.40  **(0.03)** | 3.53 ± 1.56  **(0.02)** | 7-12 |
| 3.43 ± 1.16  (0.003) | 4.73 ± 1.99  **(0.01)** | 3.68 ± 1.69  **(0.03)** | 2.08 ± 1.35  (0.12) | 2.76 ± 1.34  **(0.04)** | 2.64 ± 1.70  (0.12) | >12 |
|  |  |  |  |  |  | Marital Status |
| 2.49 ± 1.03  (0.01) | 0.90 ± 2.50  (0.71) | 0.77 ± 1.60  (0.62) | 1. 35 ± 1.00  (0.17) | 1.13 ± 0.81  (0.16) | -1.44 ± 1.06  (0.17) | Married |
| 3.29 ± 1.43  (0.02) | 1.61 ± 3.33  (0.62) | 0.73 ± 1.84  (0.69) | 2.38 ± 1.21  **(0.05)** | 1.77 ± 1.44  (0.22) | 1.27 ± 1.40  (0.86) | Divorced/ Widowed |
|  |  |  |  |  |  | Residence |
|  | 48.93 | 20.78 | 16.69 | 10.17 | 18.61 |  |
|  | 0.01 | 0.01 | 0.01 | - | 0.01 | ICC |
|  |  |  |  |  |  | Province |
|  | 61.14 | 31.62 | 19.79 | 9.27 | 12.21 |  |
|  | 0.02 | 0.02 | 0.02 | - | - | ICC |
|  | 2890.13 | 1456.94 | 906.61 | 1156 | 1817.31 |  |
| 87894.4 | 93420.6 | 89608.7 | 87301.7 | 87460.4 | 89145.1 | AIC |

Entries show β ± SE (p - value) for 10th, 25th, 50th, 75th and 90th percentiles of LDL-cholesterol. Significant coefficients are shown in Bold. AIC: Akaike Information Criterion, ICC: Intraclass Correlation Coefficient, : Random effect variance, **:** Error variance.

**Table S5** Three-level Quantile regression coefficients for male participants’ HDL-C in 2016 National STEPs study.

| Linear Regression | P90 | P75 | P50 | P25 | P10 | Factors |
| --- | --- | --- | --- | --- | --- | --- |
| 0.06 ± 0.01  (<0.001) | 0.10 ± 0.03  **(0.001)** | 0.07 ± 0.01  **(<0.001)** | 0.06 ± 0.01  **(<0.001)** | 0.04 ± 0.01  **(<0.001)** | 0.05 ± 0.01  **(0.003)** | Age (year) |
| -0.39 ± 0.04  (<0.001) | -0.42 ± 0.10  **(<0.001)** | -0.41 ± 0.06  **(<0.001)** | -0.35 ± 0.05  **(<0.001)** | -0.37 ± 0.06  **(<0.001))** | -0.30 ± 0.07  **(<0.001)** | BMI(kg/m2) |
| -0.07 ± 0.01  (<0.001) | -0.11± 0.03  **(0.003)** | -0.09 ± 0.02  **(<0.001)** | -0.08 ± 0.02  **(<0.001)** | -0.06 ± 0.02  **(0.007)** | -0.07 ± 0.02  **(0.006)** | WC (cm) |
| -1.20 ± 0.37  (0.001) | -1.05 ± 1.04  (0.31) | -1.37 ± 0.42  **(0.001)** | -1.22 ± 0.29  **(<0.001)** | -1.30 ± 0.30  **(<0.001)** | -1.26 ± 0.40  **(0.002)** | Diabetes |
| -2.14 ± 0.27  (<0.001) | -2.41 ± 0.73  **(0.001)** | -2.15 ± 0.43  **(<0.001)** | -2.22 ± 0.31  **(<0.001)** | -2.02 ± 0.21  **(<0.001)** | 2.12 ± 0.27  **(<0.001)** | Smoking |
|  |  |  |  |  |  | Physical Activity |
| 0.46 ± 0.29  (0.12) | 0.27 ± 0.91  (0.76) | 0.07 ± 0.52  (0.79) | 0.49 ± 0.38  (0.20) | 0.78 ± 0.35  **(0.02)** | 0.63 ± 0.41  (0.13) | Moderate |
| 1.62 ± 0.24  (<0.001) | 1.89 ± 0.53  **(<0.001)** | 1.55 ± 0.35  **(<0.001)** | 1.43 ± 0.24  **(<0.001)** | 1.35 ± 0.22  **(<0.001)** | 1.02 ± 0.34  **(0.003)** | High |
|  |  |  |  |  |  | Residence |
|  | 4.60 | 2.87 | 2.41 | 1.55 | 2.18 |  |
|  | 0.01 | 0.01 | 0.02 | 0.01 | 0.01 | ICC |
|  |  |  |  |  |  | Province |
|  | 3.88 | 4.09 | 3.49 | 1.69 | 1.59 |  |
|  | 0.01 | 0.02 | 0.03 | 0.01 | - | ICC |
|  | 367.48 | 175.03 | 101.60 | 121 | 185.23 |  |
| 56164.0 | 61595.4 | 58025.6 | 55595.4 | 55209.7 | 56404.7 | AIC |

Entries show β ± SE (p - value) for 10th, 25th, 50th, 75th and 90th percentiles of HDL-cholesterol. Significant coefficients are shown in Bold. AIC: Akaike Information Criterion, ICC: Intraclass Correlation Coefficient, : Random effect variance, **:** Error variance.

**Table S6** Three-level Quantile regression coefficients for female participants’ HDL-C in 2016 National STEPs study.

| Linear Regression | P90 | P75 | P50 | P25 | P10 | Factors |
| --- | --- | --- | --- | --- | --- | --- |
| 0.08 ± 0.01  (<0.001) | 0.14 ± 0.03  **(<0.001)** | 0.10 ± 0.01  **(<0.001)** | 0.09 ± 0.01  **(<0.001)** | 0.08 ± 0.02  **(<0.001)** | 0.04 ± 0.02  **(0.03)** | Age (year) |
| -0.18 ± 0.03  (0.004) | -0.24 ± 0.08  **(0.003)** | -0.24 ± 0.07  **(<0.001)** | -0.14 ± 0.04  **(0.004)** | -0.15 ± 0.06  **(0.01)** | -0.08 ± 0.07  (0.28) | BMI(kg/m2) |
| -0.10 ± 0.01  (<0.001) | -0.12 ± 0.03  **(<0.001)** | -0.10 ± 0.02  **(<0.001)** | -0.12 ± 0.01  **(<0.001)** | - 0.10 ± 0.02  **(<0.001)** | -0.09 ± 0.02  **(<0.001)** | WC (cm) |
| -1.45 ± 0.36  (<0.001) | -1.76 ± 0.81 **(0.03)** | -1.94 ± 0.52  **(<0.001)** | -1.60 ± 0.41  **(<0.001)** | -1.31 ± 0.42  **(0.002)** | -1.51 ± 0.37  **(<0.001)** | Diabetes |
|  |  |  |  |  |  | Physical Activity |
| 0.06 ± 0.30  (0.98) | 0.13 ± 0.84  (0.87) | 0.34 ± 0.51  (0.51) | 0.01 ± 0.42  (0.97) | -0.61 ± 0.42  (0.14) | -0.42 ± 0.49  (0.38) | Moderate |
| 1.20 ± 0.32  (<0.001) | 1.14 ± 0.81  (0.16) | 0.98 ± 0.64  (0.13) | 0.78 ± 0.35  **(0.02)** | 0.45 ± 0.33  (0.17) | 1.21 ± 0.35  **(<0.001)** | High |
|  |  |  |  |  |  | Education Level |
| 0.53 ± 0.40  (0.18) | 0.43 ± 0.95 (0.65) | 0.42 ± 0.64  (0.51) | 0.46 ± 0.40  (0.25) | 0.40 ± 0.50  (0.43) | 0.80 ± 0.57  (0.16) | 1-6 |
| 0.67 ± 0.41  (0.10) | 1.48 ± 1.02  (0.14) | 0.87 ± 0.65  (0.18) | 0.64 ± 0.57  (0.26) | 0.69 ± 0.54  (0.20) | 0.83 ± 0.61  (0.17) | 7-12 |
| 1.93 ± 0.46  (<0.001) | 2.84 ± 1.28  **(0.02)** | 2.17 ± 0.87  **(0.01)** | 2.14 ± 0.58  **(<0.001)** | 1.45 ± 0.56  **(0.01)** | 1.63 ± 0.75  **(0.03)** | >12 |
|  |  |  |  |  |  | Marital Status |
| -0.60 ± 0.41  (0.14) | 1.81-± 0.92  **(0.05)** | -1.52 ± 0.58  **(0.01)** | -1.13 ± 0.50  **(0.02)** | -1.09 ± 0.49  **(0.03)** | -0.15 ± 0.58  (0.78) | Married |
| -0.68 ± 0.57  (0.22) | -2.75 ± 1.18  **(0.02)** | -1.64 ± 0.70  **(0.02)** | -1.13 ± 0.49  **(0.02)** | -0.86 ± 0.72  (0.23) | -0.32 ± 0.80  (0.68) | Divorced/ Widowed |
|  |  |  |  |  |  | Residence |
|  | 5.23 | 0.87 | 0.95 | 1.28 | 4.32 |  |
|  | 0.01 | 0.003 | 0.006 | - | 0.01 | ICC |
|  |  |  |  |  |  | Province |
|  | 5.72 | 2.56 | 2.13 | 1.46 | 65.88 |  |
|  | 0.01 | 0.01 | 0.01 | 0.008 | 0.003 | ICC |
|  | 494.17 | 244.29 | 146.89 | 178.75 | 278.89 |  |
| 71079.2 | 77199.9 | 73190 | 70572.4 | 70341.4 | 71988.8 | AIC |

Entries show β ± SE (p - value) for 10th, 25th, 50th, 75th and 90th percentiles of HDL-cholesterol. Significant coefficients are shown in Bold. AIC: Akaike Information Criterion, ICC: Intraclass Correlation Coefficient, : Random effect variance, **:** Error variance.

**Table S7** Three-level Quantile regression coefficients for male participants’ TC/HDL-C in 2016 National STEPs study.

| Linear Regression | P90 | P75 | P50 | P25 | P10 | Factors |
| --- | --- | --- | --- | --- | --- | --- |
| 0.00 ± 0.001  (0.57) | 0.004 ± 0.003  (0.24) | 0.004 ± 0.002  (0.12) | 0.001 ± 0.001  (0.32) | 0.001 ± 0.001  (0.45) | 0.00 ± 0.002  (0.88) | Age (year) |
| 0.07 ± 0.005  (<0.001) | 0.12 ± 0.01  **(<0.001)** | 0.10 ± 0.01  **(<0.001)** | 0.08 ± 0.01  **(<0.001)** | 0.05 ± 0.008  **(<0.001)** | 0.04 ± 0.008  **(<0.001)** | BMI(kg/m2) |
| 0.01 ± 0.002  (<0.001) | 0.01 ± 0.005  **(0.002)** | 0.009 ± 0.005  **(0.05)** | 0.01 ± 0.004  **(0.001)** | 0.01 ± 0.002  **(<0.001)** | 0.01 ± 0.002  **(<0.001)** | WC (cm) |
| 0.04 ± 0.05  (0.38) | 0.48 ± 0.13  **(<0.001)** | 0.13 ± 0.10  (0.19) | -0.04 ± 0.07  (0.49) | -0.08 ± 0.06  (0.17) | -0.15 ± 0.06  **(0.02)** | Diabetes |
| 0.32 ± 0.03  (<0.001) | 0.56 ± 0.09  **(<0.001)** | 0.34 ± 0.05  **(<0.001)** | 0.31 ± 0.04  **(<0.001)** | 0.21 ± 0.04  **(<0.001)** | 0.13 ± 0.03  **(<0.001)** | Smoking |
|  |  |  |  |  |  | Physical Activity |
| -0.16 ± 0.04  (0.001) | -0.19 ± 0.10  (0.06) | -0.15 ± 0.09  (0.10) | -0.16 ± 0.04  **(0.001)** | -0.10 ± 0.05  (0.07) | -0.13 ± 0.04  **(0.004)** | Moderate |
| -0.22 ± 0.03  (<0.001) | -0.29 ± 0.09  **(0.002)** | -0.27 ± 0.05  **(<0.001)** | -0.22 ± 0.04  **(<0.001)** | -0.17 ± 0.03  **(<0.001)** | -0.13 ± 0.03  **(<0.001)** | High |
|  |  |  |  |  |  | Education Level |
| 0.02 ± 0.07  (0.77) | -0.12 ± 0.18  (0.51) | 0.06 ± 0.11  (0.61) | 0.10 ± 0.06  (0.11) | 0.05 ± 0.07  (0.43) | 0.03 ± 0.07  (0.64) | 1-6 |
| 0.13 ± 0.07  (0.05) | 0.15 ± 0.19  (0.42) | 0.17 ± 0.12  (0.16) | 0.19 ± 0.06  **(0.007)** | 0.16 ± 0.06  **(0.01)** | 0.11 ± 0.06  (0.10) | 7-12 |
| 0.20 ± 0.07  (0.007) | 0.22 ± 0.17  (0.21) | 0.29 ± 0.13  **(0.03)** | 0.27 ± 0.08  **(0.001)** | 0.26 ± 0.08  **(0.001)** | 0.19 ± 0.06  **(0.006)** | >12 |
|  |  |  |  |  |  | Marital Status |
| 0.14 ± 0.05  (0.008) | 0.18 ± 0.10  (0.07) | 0.11 ± 0.08  (0.18) | 0.13 ± 0.05  **(0.009)** | 0.10 ± 0.04  **(0.01)** | 0.09 ± 0.05  (0.10) | Married |
| 0.08 ± 0.16  (0.59) | 0.47 ± 0.30  (0.12) | 0.04 ± 0.36  (0.90) | 0.03 ± 0.26  (0.90) | -0.09 ± 0.16  (0.57) | 0.16 ± 0.15  (0.29) | Divorced/ Widowed |
|  |  |  |  |  |  | Residence |
|  | 0.12 | 0.03 | 4.88 | 0.01 | 0.56 |  |
|  | 0.01 | 0.01 | 0.70 | - | 0.13 | ICC |
|  |  |  |  |  |  | Province |
|  | 0.22 | 4.41 | 0.01 | 34.15 | 3.26 |  |
|  | 0.02 | 0.55 | - | 0.93 | 0.47 | ICC |
|  | 7.34 | 3.57 | 2.07 | 2.46 | 3.64 |  |
| 26766.1 | 31995.4 | 28511.2 | 26129.7 | 25730.9 | 26680.7 | AIC |

Entries show β ± SE (p - value) for 10th, 25th, 50th, 75th and 90th percentiles of total cholesterol/LDL. Significant coefficients are shown in Bold. AIC: Akaike Information Criterion, ICC: Intraclass Correlation Coefficient, : Random effect variance, **:** Error variance.

**Table S8** Three-level Quantile regression coefficients for female participants’ TC/HDL-C in 2016 National STEPs study.

| Linear Regression | P90 | P75 | P50 | P25 | P10 | Factors |
| --- | --- | --- | --- | --- | --- | --- |
| 0.01 ± 0.001  (<0.001) | 0.01 ± 0.002  **(<0.001)** | 0.01 ± 0.001  **(<0.001)** | 0.01 ± 0.001  **(<0.001)** | 0.005 ± 0.001  **(<0.001)** | 0.005 ± 0.001  **(<0.001)** | Age (year) |
| 0.03 ± 0.003  (<0.001) | 0.05 ± 0.01  **(<0.001)** | 0.04 ± 0.008  **(<0.001)** | 0.03 ± 0.005  **(<0.001)** | 0.03 ± 0.004  **(<0.001)** | 0.02 ± 0.004  **(<0.001)** | BMI(kg/m2) |
| 0.01 ± 0.001  (<0.001) | 0.01 ± 0.005  **(0.02)** | 0.01 ± 0.003  **(<0.001)** | 0.01 ± 0.002  **(<0.001)** | 0.009 ± 0.002  **(<0.001)** | 0.006 ± 0.001  **(<0.001)** | WC (cm) |
| 0.15 ± 0.04  (0.14) | 0.37 ± 0.09  **(<0.001)** | 0.22 ± 0.06  **(0.001)** | 0.08 ± 0.05  (0.14) | 0.04 ± 0.04  (0.35) | -0.01 ± 0.05  (0.75) | Diabetes |
| 0.09 ± 0.03  (0.003) | 0.20 ± 0.05  **(<0.001)** | 0.07 ± 0.04  (0.12) | 0.06 ± 0.04  (0.10) | 0.03 ± 0.03  (0.22) | -0.02 ± 0.03  (0.43) | Hypertension |
|  |  |  |  |  |  | Residence |
|  | 0.18 | 0.02 | - | 1.65 | 7.59 |  |
|  | 0.02 | - | - | 0.46 | 0.73 | ICC |
|  |  |  |  |  |  | Province |
|  | 0.04 | 7.40 | - | 0.15 | 0.49 |  |
|  | - | 0.70 | - | 0.07 | 0.15 | ICC |
|  | 6.45 | 3.02 | 1.69 | 1.90 | 2.72 |  |
| 30561.6 | 37449.5 | 32928.8 | 29593.6 | 28699.1 | 29486.3 | AIC |

Entries show β ± SE (p - value) for 10th, 25th, 50th, 75th and 90th percentiles of total cholesterol/HDL. Significant coefficients are shown in Bold. AIC: Akaike Information Criterion, ICC: Intraclass Correlation Coefficient, : Random effect variance, **:** Error variance.

**Table S9** Three-level Quantile regression coefficients for male participants’ LDL-C/HDL-C in 2016 National STEPs study.

| Linear Regression | P90 | P75 | P50 | P25 | P10 | Factors |
| --- | --- | --- | --- | --- | --- | --- |
| 0.002 ± 0.001  (0.04) | 0.006 ± 0.002  **(0.01)** | 0.005 ± 0.002  **(0.01)** | 0.001 ± 0.002  **(0.04)** | 0.001 ± 0.001  (0.31) | 0.00 ± 0.001  (0.75) | Age (year) |
| 0.04 ± 0.004  (<0.001) | 0.07 ± 0.009  **(<0.001)** | 0.06 ± 0.009  **(<0.001)** | 0.006 ± 0.008  **(<0.001)** | 0.03 ± 0.007  **(<0.001)** | 0.03 ± 0.006  **(<0.001)** | BMI(kg/m2) |
| 0.01 ± 0.001  (<0.001) | 0.01 ± 0.003  **(0.001)** | 0.009 ± 0.004  **(0.01)** | 0.01 ± 0.001  **(<0.001)** | 0.01 ± 0.002  **(<0.001)** | 0.006 ± 0.001  **(0.001)** | WC (cm) |
| -0.05 ± 0.03  (0.20) | 0.27 ± 0.07  **(<0.001)** | -0.03 ± 0.07  (0.63) | -0.02 ± 0.05  (0.09) | -0.14 ± 0.06  **(0.01)** | -0.18 ± 0.05  **(0.002)** | Diabetes |
| 0.23 ± 0.02  (<0.001) | 0.41 ± 0.06  **(<0.001)** | 0.25 ± 0.04  **(<0.001)** | 0.20 ± 0.02  **(<0.001)** | 0.16 ± 0.03  **(<0.001)** | 0.10 ± 0.03  **(0.001)** | Smoking |
|  |  |  |  |  |  | Physical Activity |
| -0.10 ± 0.03  (<0.001) | -0.07 ± 0.06  (0.24) | -0.08 ± 0.06  (0.17) | -0.11 ± 0.02  **(0.003)** | -0.11 ± 0.04  **(0.01)** | -0.07 ± 0.03  **(0.05)** | Moderate |
| -0.15 ± 0.02  (<0.001) | -0.20 ± 0.05  **(<0.001)** | -0.19 ± 0.04  **(<0.001)** | -1.48 ± 2.89  **(<0.001)** | -0.12 ± 0.02  **(<0.001)** | -0.08 ± 0.03  **(0.01)** | High |
|  |  |  |  |  |  | Education Level |
| -0.01 ± 0.05  (0.77) | -0.03 ± 0.11  (0.75) | 0.03 ± 0.08  (0.71) | 0.04 ± 0.05  (0.09) | 0.06 ± 0.06  (0.37) | 0.05± 0.05  (0.33) | 1-6 |
| 0.05 ± 0.05  (0.26) | 0.08 ± 0.12  (0.49) | 0.09 ± 0.08  (0.27) | 0.11 ± 0.05  (0.10) | 0.12 ± 0.06  **(0.05)** | 0.11 ± 0.05  **(0.04)** | 7-12 |
| 0.11 ± 0.05  (0.04) | 0.12 ± 0.12  (0.30) | 0.19 ± 0.09  **(0.03)** | 0.18 ± 0.07  **(<0.001)** | 0.18 ± 0.08  **(0.02)** | 0.13 ± 0.05  **(0.02)** | >12 |
|  |  |  |  |  |  | Marital Status |
| 0.07 ± 0.03  (0.04) | 0.06 ± 0.08  (0.44) | 0.10 ± 0.06  (0.08) | 0.10 ± 0.03  **(0.01)** | 0.09 ± 0.03  **(0.009)** | 0.06 ± 0.04  (0.13) | Married |
| 0.05 ± 0.11  (0.66) | 0.48 ± 0.22  **(0.03)** | 0.19 ± 0.28  (0.48) | 0.10 ± 0.11  (0.86) | 0.07 ± 0.16  (0.66) | 0.06 ± 0.10  (0.57) | Divorced/ Widowed |
|  |  |  |  |  |  | Residence |
|  | 0.03 | 0.02 | 0.01 | - | 0.68 |  |
|  | - | 0.01 | 0.01 | - | 0.24 | ICC |
|  |  |  |  |  |  | Province |
|  | 0.03 | 0.78 | 0.01 | 0 | 0.65 |  |
|  | - | 0.29 | 0.01 | - | 0.23 | ICC |
|  | 3.72 | 1.87 | 1.12 | 1.39 | 2.13 |  |
| 21927.2 | 26818.4 | 23668.5 | 21544.7 | 21453.6 | 22647.4 | AIC |

Entries show β ± SE (p - value) for 10th, 25th, 50th, 75th and 90th percentiles of LDL-C/HDL-C. Significant coefficients are shown in Bold. AIC: Akaike Information Criterion, ICC: Intraclass Correlation Coefficient, : Random effect variance, **:** Error variance.

**Table S10** Three-level Quantile regression coefficients for female participants’ LDL-C/HDL-C in 2016 National STEPs study.

| Linear Regression | P90 | P75 | P50 | P25 | P10 | Factors |
| --- | --- | --- | --- | --- | --- | --- |
| 0.01 ± 0.001  (<0.001) | 0.01 ± 0.002  **(<0.001)** | 0.01 ± 0.001  **(<0.001)** | 0.01 ± 0.001  **(<0.001)** | 0.009 ± 0.001  **(<0.001)** | 0.009 ± 0.001  **(<0.001)** | Age (year) |
| 0.01 ± 0.003  (<0.001) | 0.02 ± 0.006  **(0.001)** | 0.01 ± 0.006  **(0.004)** | 0.01 ± 0.005  **(0.001)** | 0.01 ± 0.004  **(<0.001)** | 0.01 ± 0.004  **(0.001)** | BMI(kg/m2) |
| 0.01 ± 0.001  (<0.001) | 0.01 ± 0.003  **(0.001)** | 0.009 ± 0.002  **(<0.001)** | 0.009 ± 0.002  **(<0.001)** | 0.008 ± 0.001  **(<0.001)** | 0.004 ± 0.002  **(0.03)** | WC (cm) |
| 0.37 ± 0.04  (<0.001) | 0.51 ± 0.10  **(<0.001)** | 0.35 ± 0.07  **(<0.001)** | 0.21 ± 0.04  **(<0.001)** | 0.09 ± 0.06  (0.16) | 0.06 ± 0.05  (0.26) | Diabetes |
| 0.17 ± 0.03  (<0.001) | 0.11 ± 0.05  **(0.02)** | 0.07 ± 0.03  **(0.03)** | 0.10 ± 0.03  **(0.005)** | 0.10 ± 0.03  **(0.001)** | 0.09 ± 0.03  **(0.007)** | Hypertension |
|  |  |  |  |  |  | Physical Activity |
| -0.04 ± 0.03  (0.13) | -0.04 ± 0.04  (0.36) | -0.01 ± 0.03  (0.71) | 0.005 ± 0.03  (0.84) | -0.01 ± 0.03  (0.73) | -0.01 ± 0.04  (0.74) | Moderate |
| -0.04 ± 0.03  (0.18) | -0.07 ± 0.06  (0.24) | -0.04 ± 0.03  (0.17) | -0.04 ± 0.03  (0.18) | -0.07 ± 0.03  **(0.04)** | -0.07 ± 0.04  (0.07) | High |
|  |  |  |  |  |  | Residence |
|  | 0.08 | 0.04 | 2.05 | 7.81 | 9.21 |  |
|  | 0.01 | 0.01 | 0.58 | 0.82 | 0.78 | ICC |
|  |  |  |  |  |  | Province |
|  | 0.52 | 0.13 | 0.19 | 0.11 | 0.06 |  |
|  | 0.07 | 0.04 | 0.11 | 0.06 | 0.02 | ICC |
|  | 6.00 | 2.52 | 1.44 | 1.69 | 2.52 |  |
| 36785.9 | 39137 | 33382.2 | 29996.6 | 29373.1 | 30748.3 | AIC |

Entries show β ± SE (p - value) for 10th, 25th, 50th, 75th and 90th percentiles of LDL-C/HDL-C. Significant coefficients are shown in Bold. AIC: Akaike Information Criterion, ICC: Intraclass Correlation Coefficient, : Random effect variance, **:** Error variance.
